# Supplementary material for: Highly emissive, naked-eye solvatochromic probe based on styryl tetrahydrodibenzo[a,i]phenanthridine for acidochromic applications
Source: Royal Society of Chemistry journal article supplement (doi:10.1039/c6ra09359k), 2016-01-01

# RSC Advances

## Supporting Information

### **Highly Emissive, Naked-Eye Solvatochromic probe Based on Styryl Tetrahydrodibenzo[a,i]phenanthridine for Acidochromic Applications**

Umamahesh Balijapalli, Saravanakumar Manickam, Manojkumar

Dhanthalu Thiyagarajan, and Sathiyarayanan Kulathu Iyer\*

School of Advanced Sciences, VIT University, Vellore-632014,  
Tamilnadu, India. Fax: +91 416 224 3092; Tel: +91 0416 2244520.

E-mail: [sathiya\\_kuna@hotmail.com](mailto:sathiya_kuna@hotmail.com)

## Table of Contents

|                 |     |
|-----------------|-----|
| 1. Figures      | S3  |
| 2. Tables       | S17 |
| 3. Spectra      | S19 |
| 4. Crystal data | S24 |
| 5. Scheme       | S33 |

## Figures

SI Figure 1. Excitation and emission spectra for dyes recorded in chloroform.

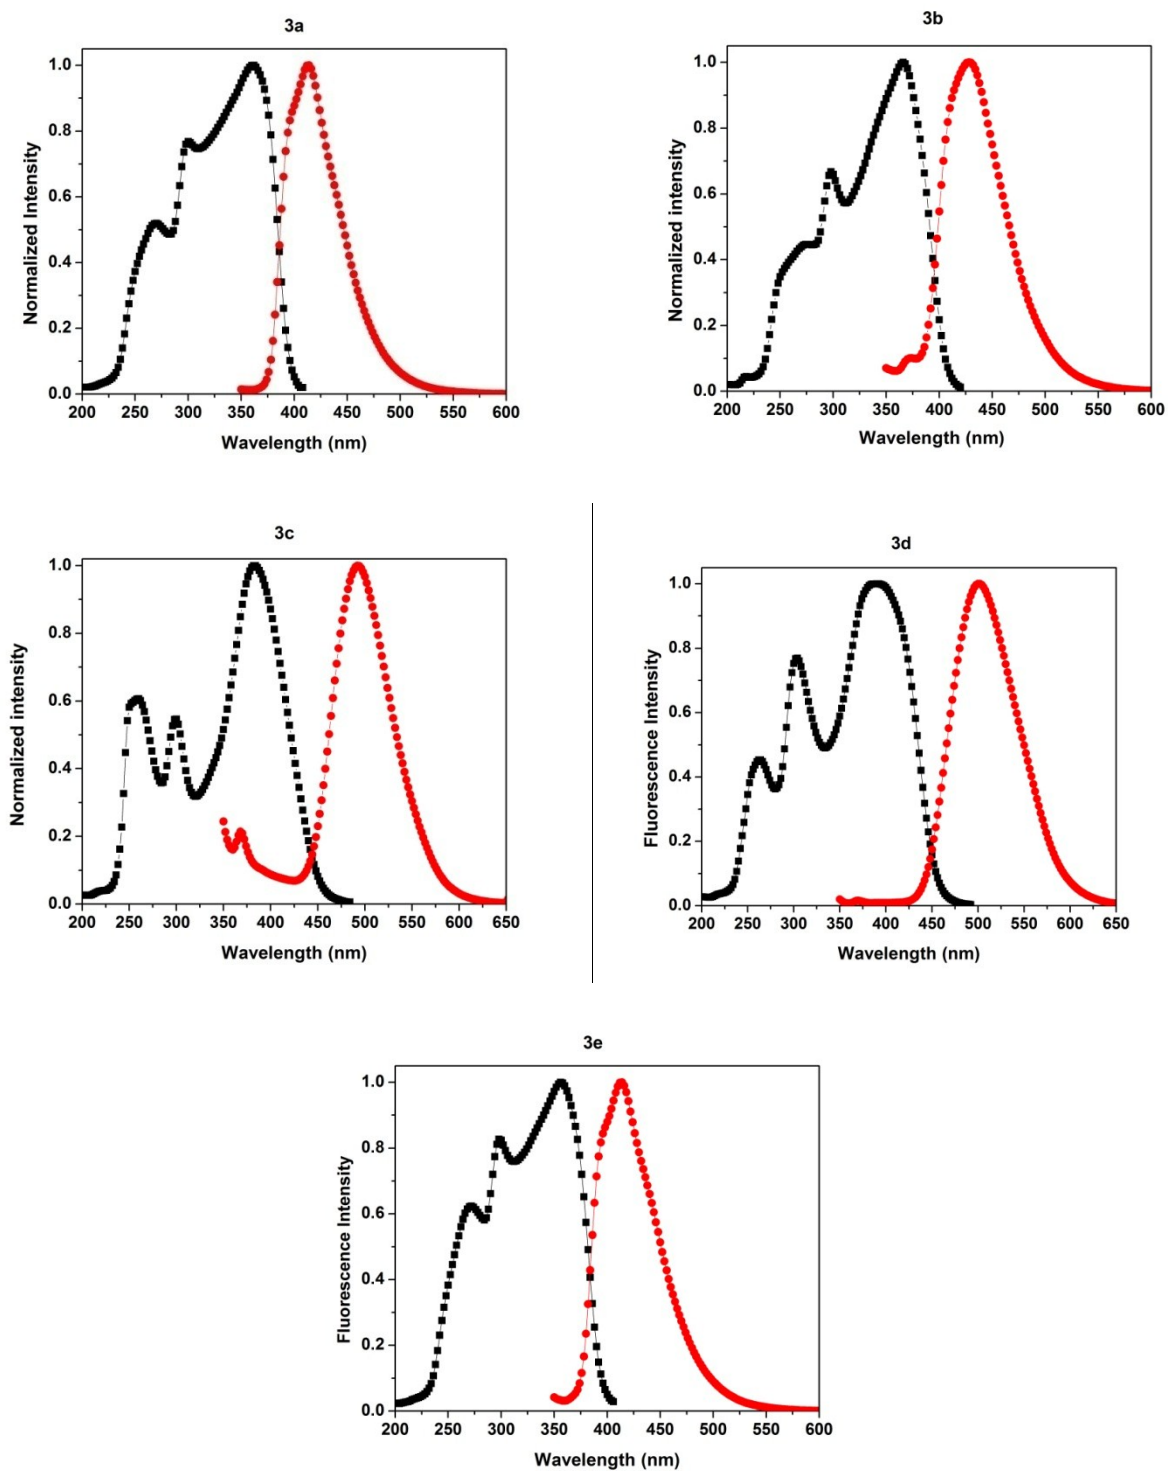

SI Figure 2. Solvatochromism spectra of dyes 3a, 3b and 3e measured in different solvents

3a

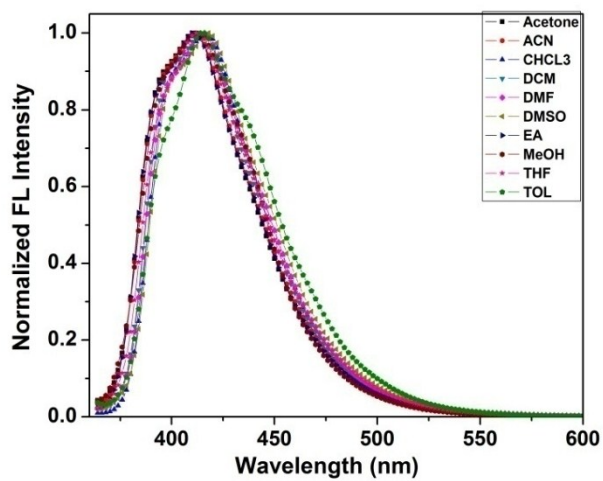

3b

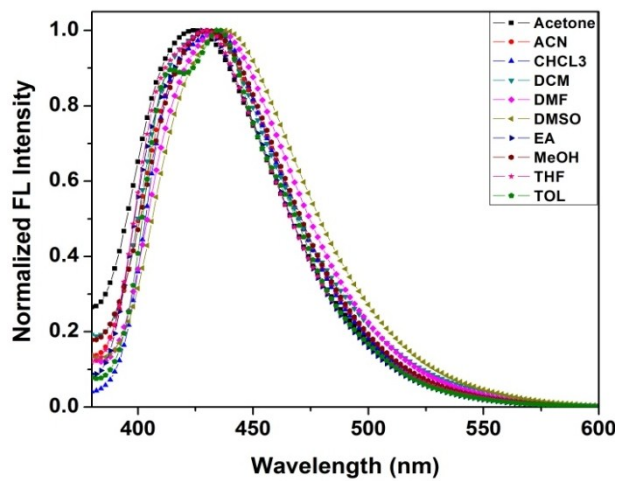

3c

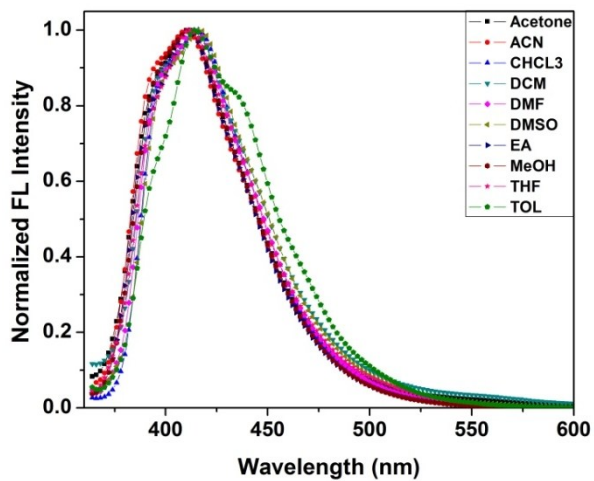

SI Figure 3. Lippert-Mataga plot

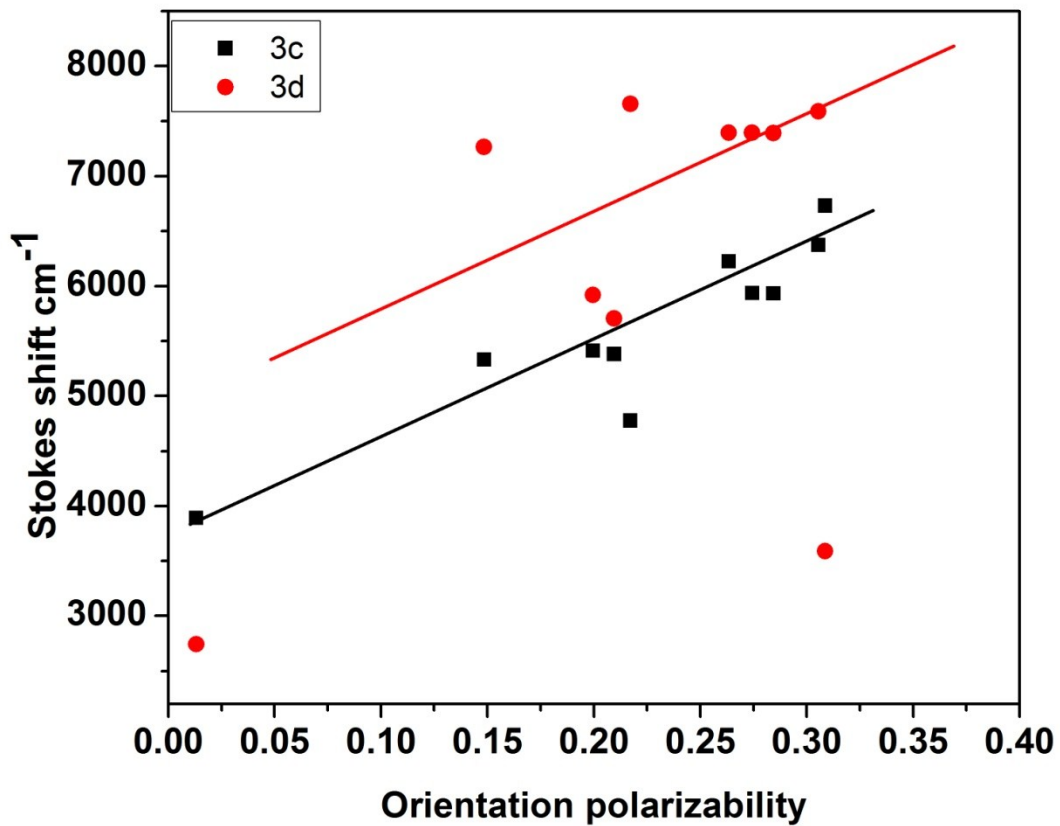

SI Figure 4. Plot of  $E_{t30}$  and Stokes shift

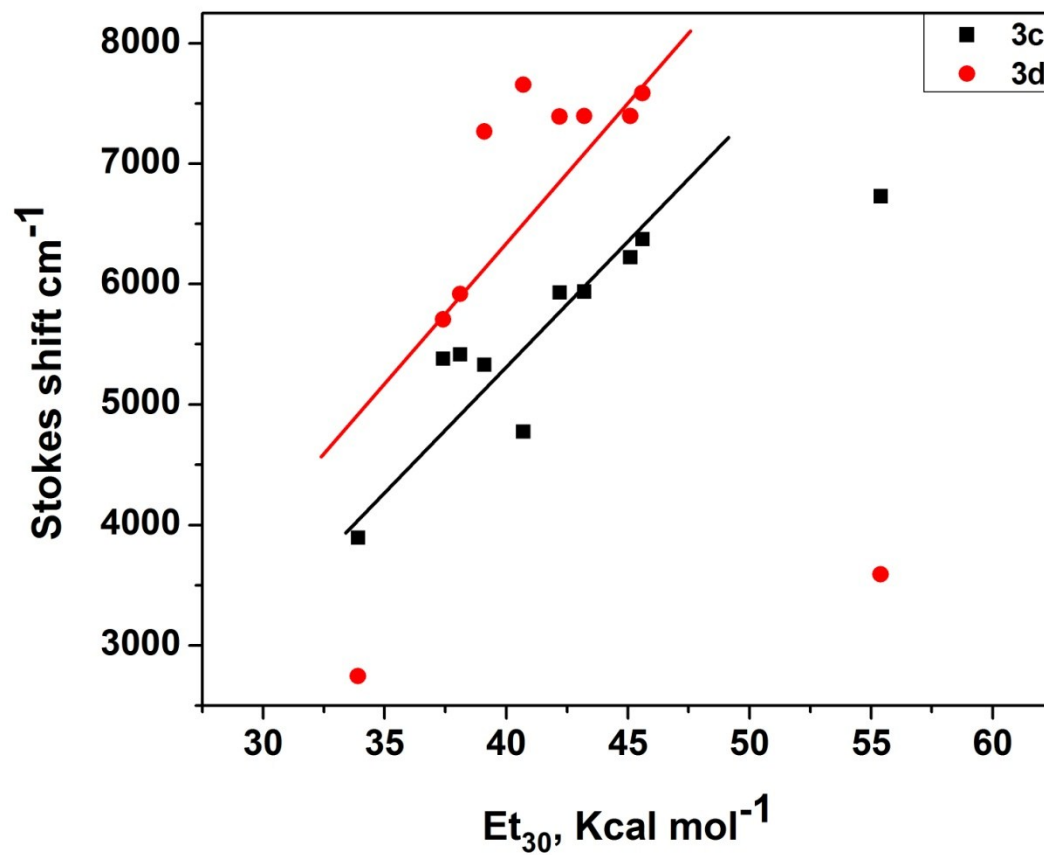

SI Figure 5. Excitation spectral changes with various pH levels

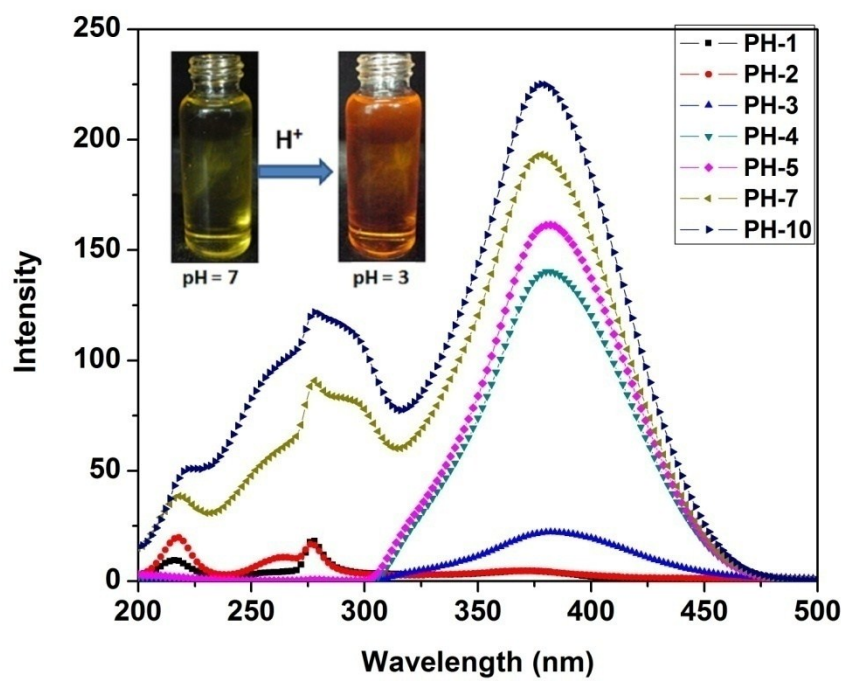

SI Figure 6. Emission spectra of dye 3a recorded with different concentrations of TFA

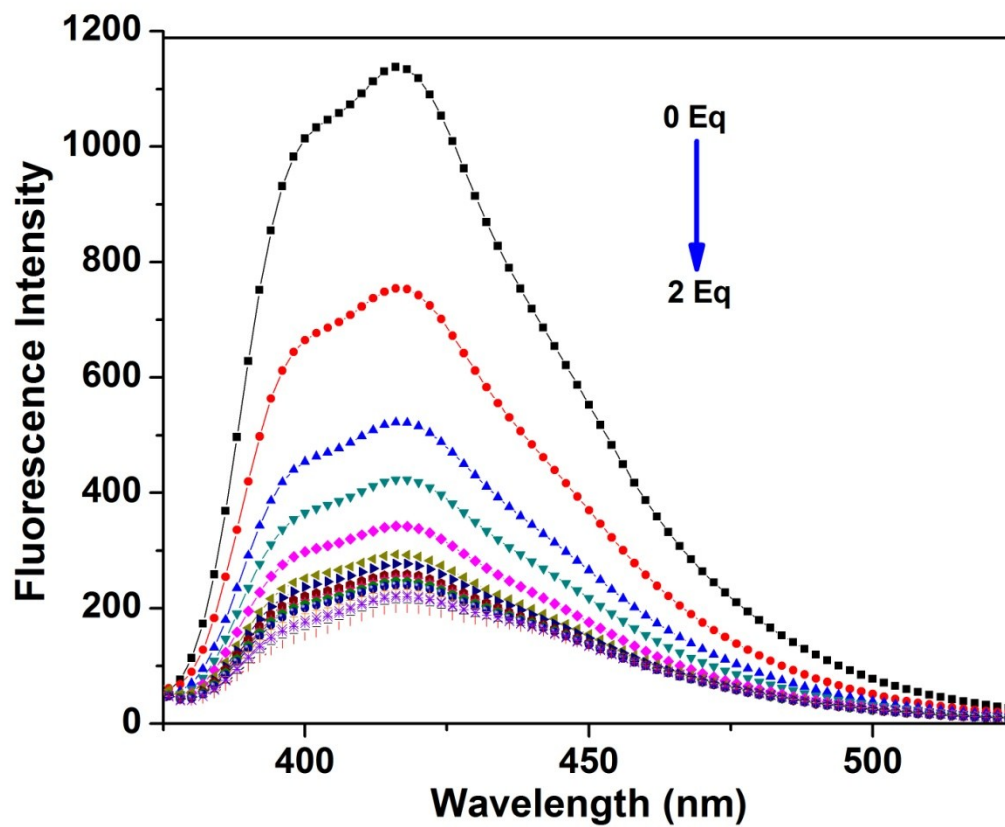



SI Figure 7. Emission spectra of dye 3d recorded with different concentrations of TFA

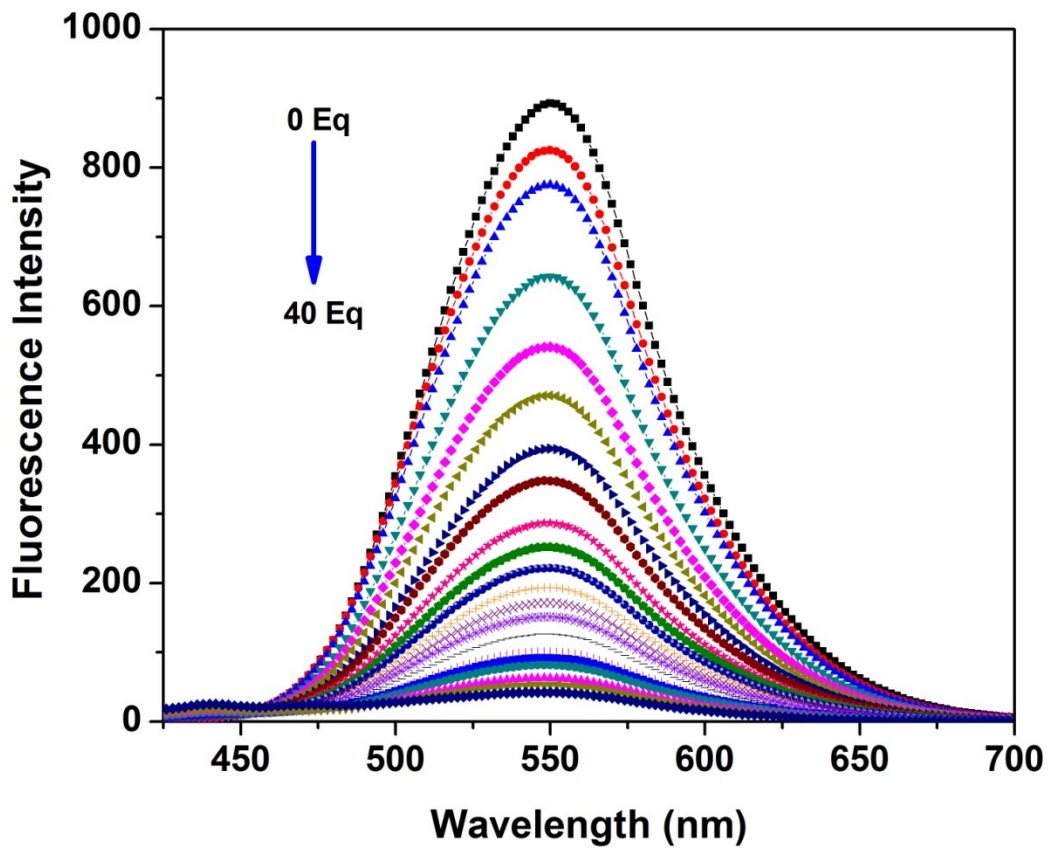

SI Figure 8. Reversible Emission spectra of dye 3d (containing TFA) recorded with different concentrations of TEA

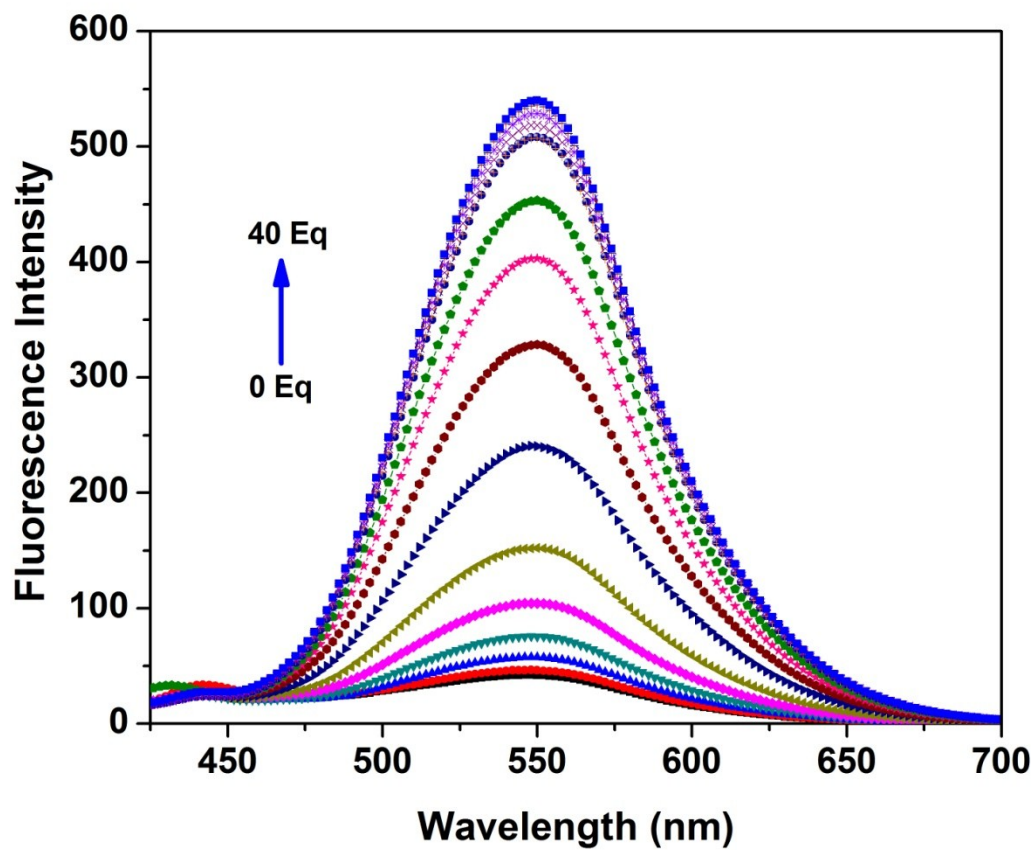

SI Figure 9. Reversible absorbance spectra of dye 3c (containing 1 eq of MSA) recorded with 1 Eq of TEA

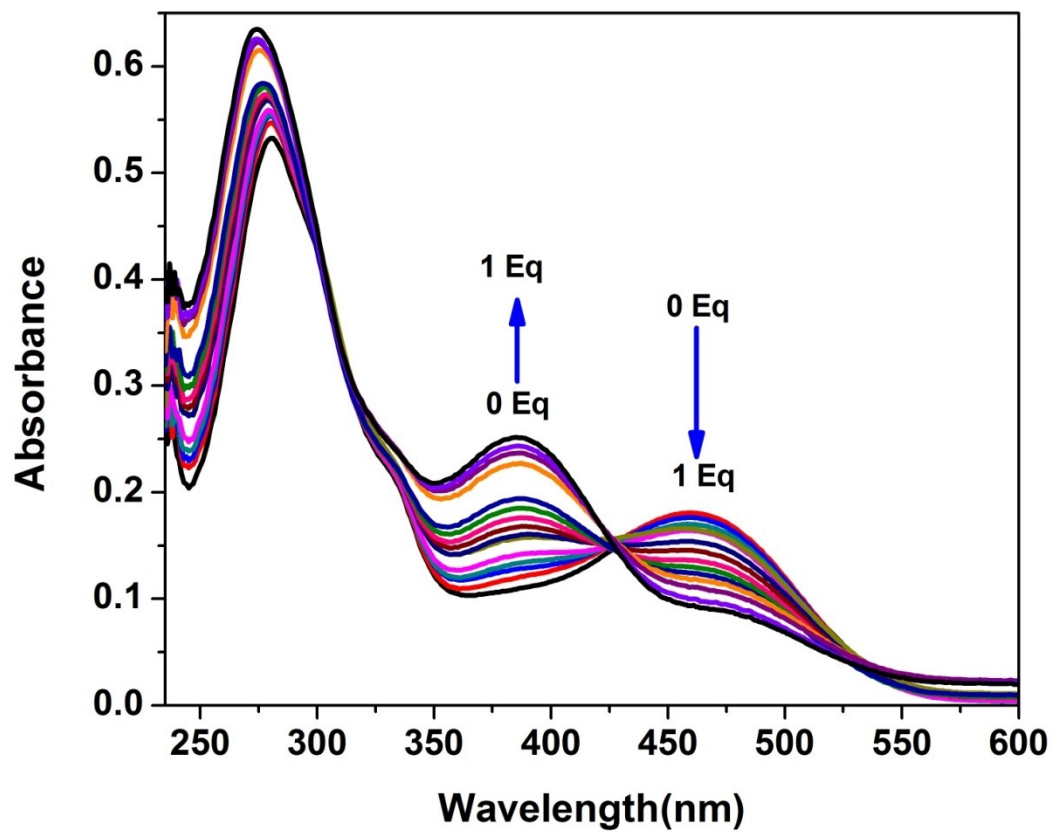

SI Figure 10. Emission spectra of dye 3c recorded with different concentrations of MSA

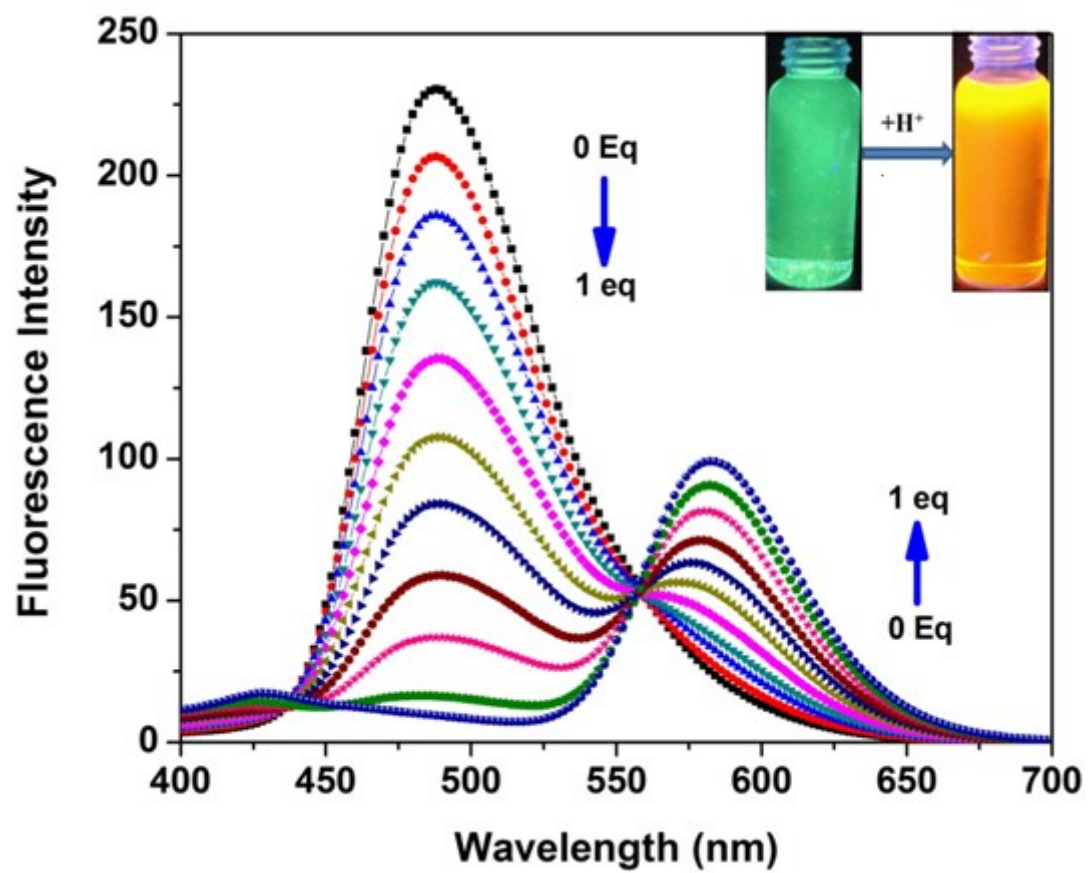

SI Figure 11. Reversible Emission spectra of dye 3c recorded with different concentrations of TEA containing 1 Eq of MSA

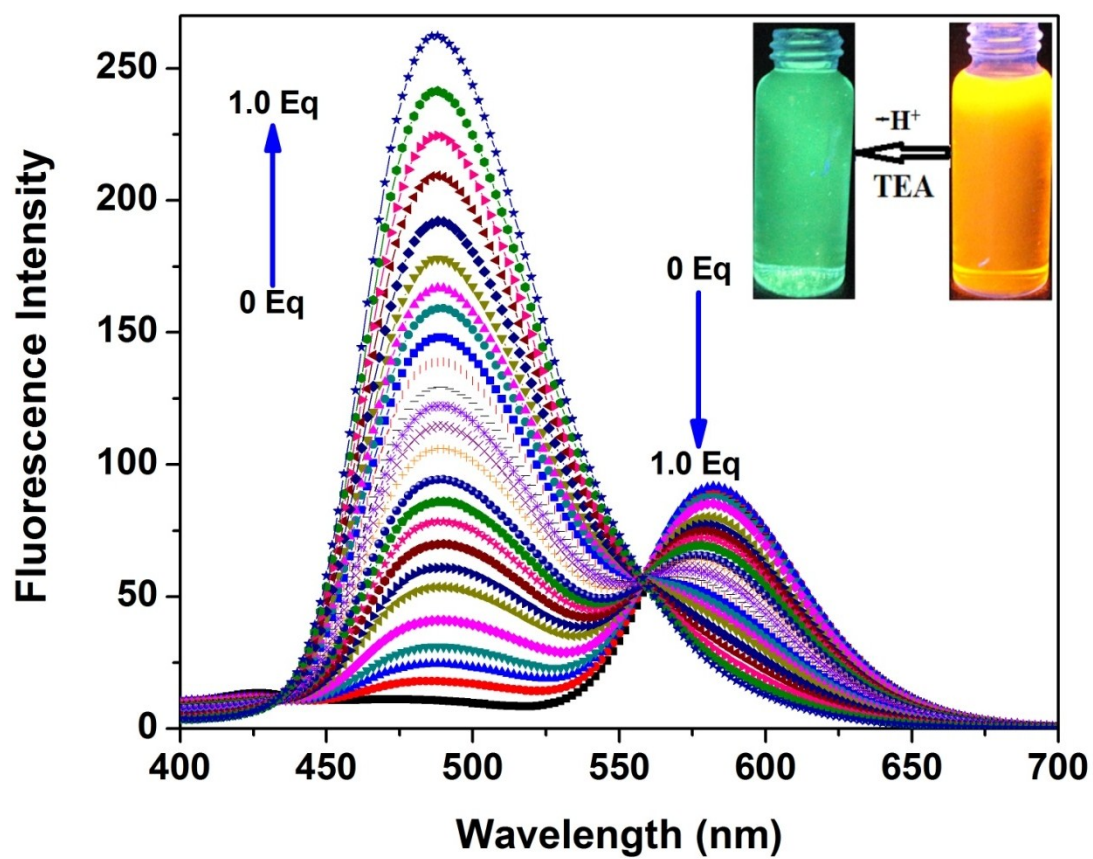

SI Figure 12. Emission spectra of dye 3c recorded with higher concentrations of MSA

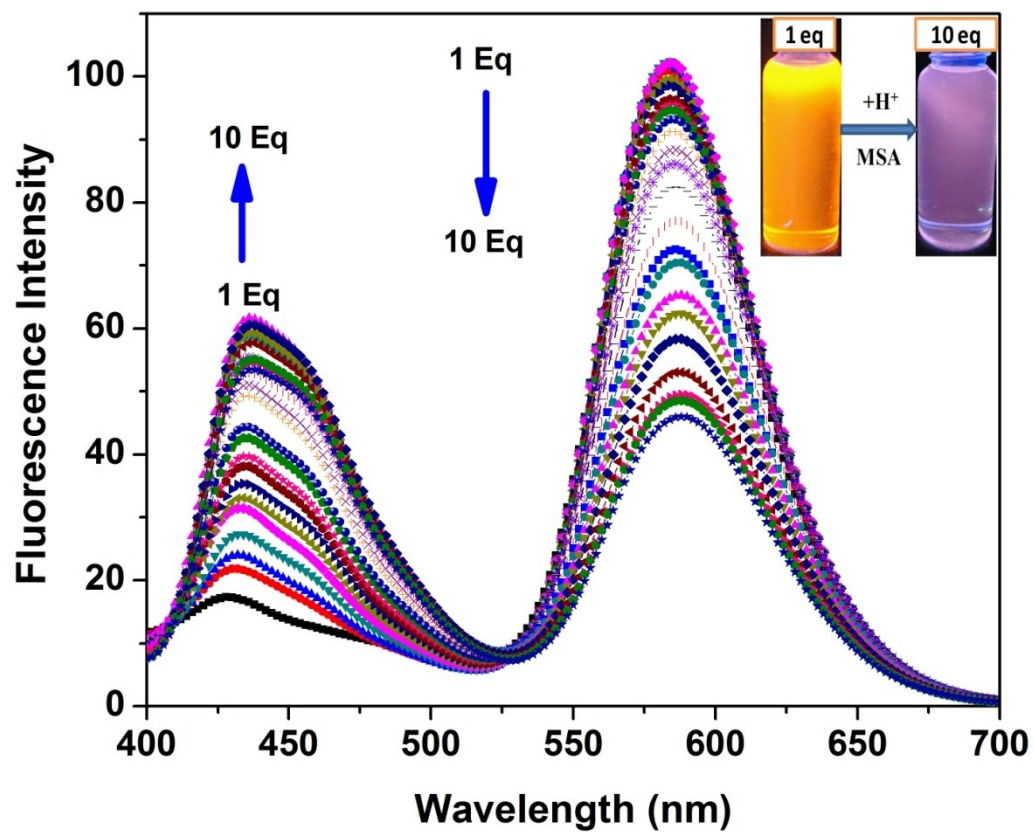

SI Figure 13. Selectivity of dye 3c towards various organic acids.

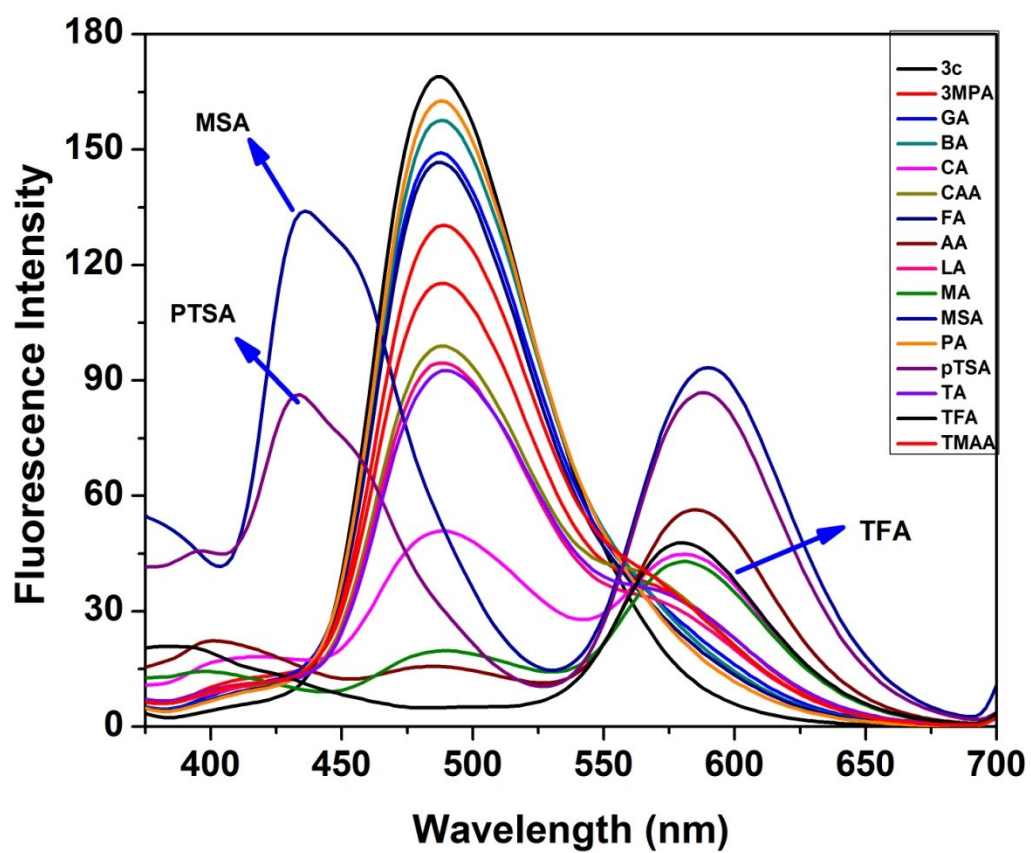

3MPA- 3-Mercaptopropanoic acid GA-Glutaric acid BA-Benzoic acid CA-Citric acid CAA-Chloroacetic acid FA-Formic Acid, AA-Acetic acid LA-Lactic acid MA-Mandelic acid MSA-Methane sulphonic acid PA-Propanoic acid PTSA-p-Toluene sulphonic acid TA-Tartaric acid TFA-Trifluoroacetic acid TMAA-Trimethylacetic acid.

SI Figure 14. Cyclic voltammograms of dyes recorded in acetonitrile solvent using glassy carbon as working electrode and 0.1 M TBAPF<sub>6</sub> as supporting electrolyte.



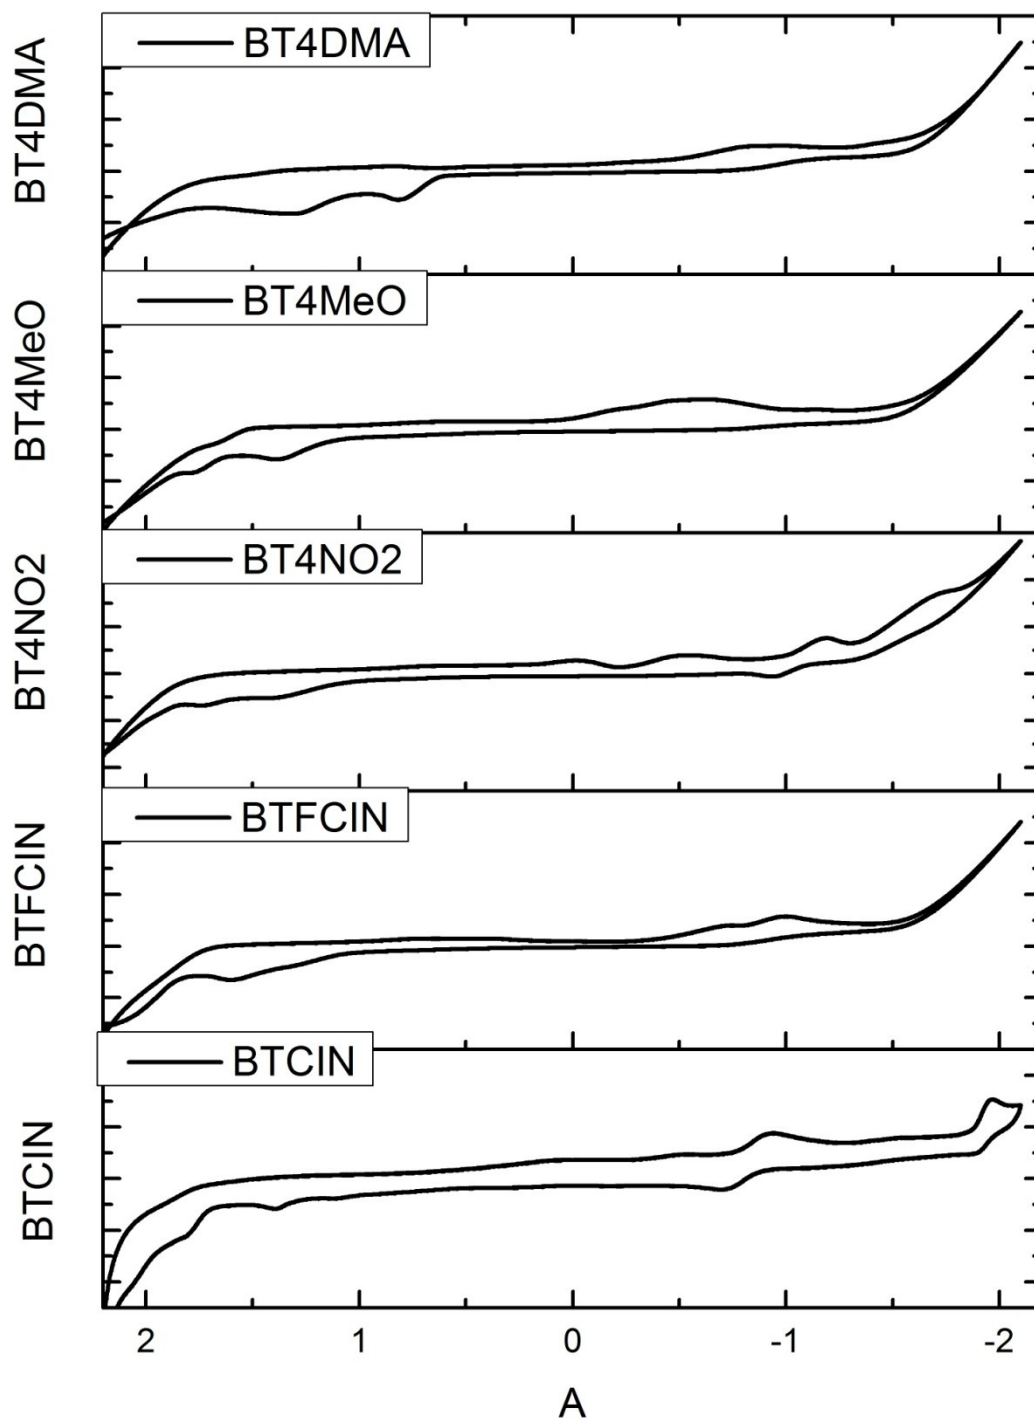

**Tables**

**SI Table 1.** Determination of pH in biological fluids

**Determination of pH in biological fluids:** The biological fluids, newborn-calf serum sample or human urine sample (the sample was taken from a healthy volunteer), were respectively adjusted to fixed pH value by addition of aliquot hydrochloric acid or aqueous sodium hydroxide. Then 2 mL of the biological fluid was added directly to 2 mL of sensor **1a** (2.0  $\mu$ M) in ethanol. The resulting solution was shaken well and incubated for 20 min at room temperature. After centrifugation, the emission ratio ( $I_{526}:I_{442}$ ) ( $\lambda_{\text{ex}} = 375$  nm) was recorded.

| Sample         | pH known <sup>a</sup> | pH found <sup>b</sup> |
|----------------|-----------------------|-----------------------|
| Serum sample 1 | 4.47                  | 4.43                  |
| Serum sample 2 | 4.82                  | 4.80                  |
| Urine sample 1 | 4.36                  | 4.35                  |
| Urine sample 2 | 4.71                  | 4.74                  |

- a. Measured by a pH-3c digital pH-meter.
- b. Obtained from the linear relationship between the ratiometric response ( $I_{526}:I_{442}$ ) of **1a** and the pH value (4.0-6.0).

SI Table 2. Electrochemical data measured in acetonitrile solvent.

|           | $E_{1/2 \text{ ox}}$ | $E_{1/2 \text{ red}}$ | HOMO <sup>b</sup><br>[eV] | LUMO <sup>b</sup><br>[eV] |
|-----------|----------------------|-----------------------|---------------------------|---------------------------|
| <b>3a</b> | 1.39                 | -1.87                 | -5.79                     | 2.53                      |
| <b>3b</b> | 1.37                 | -1.45                 | -5.77                     | 2.95                      |
| <b>3c</b> | 1.32                 | -1.42                 | -5.72                     | 2.98                      |
| <b>3d</b> | 1.39                 | -0.94                 | -5.79                     | 3.46                      |
| <b>3e</b> | 1.35                 | -1.44                 | -5.75                     | 2.96                      |

**NMR copies**

**<sup>1</sup>H-NMR spectrum of 3a**

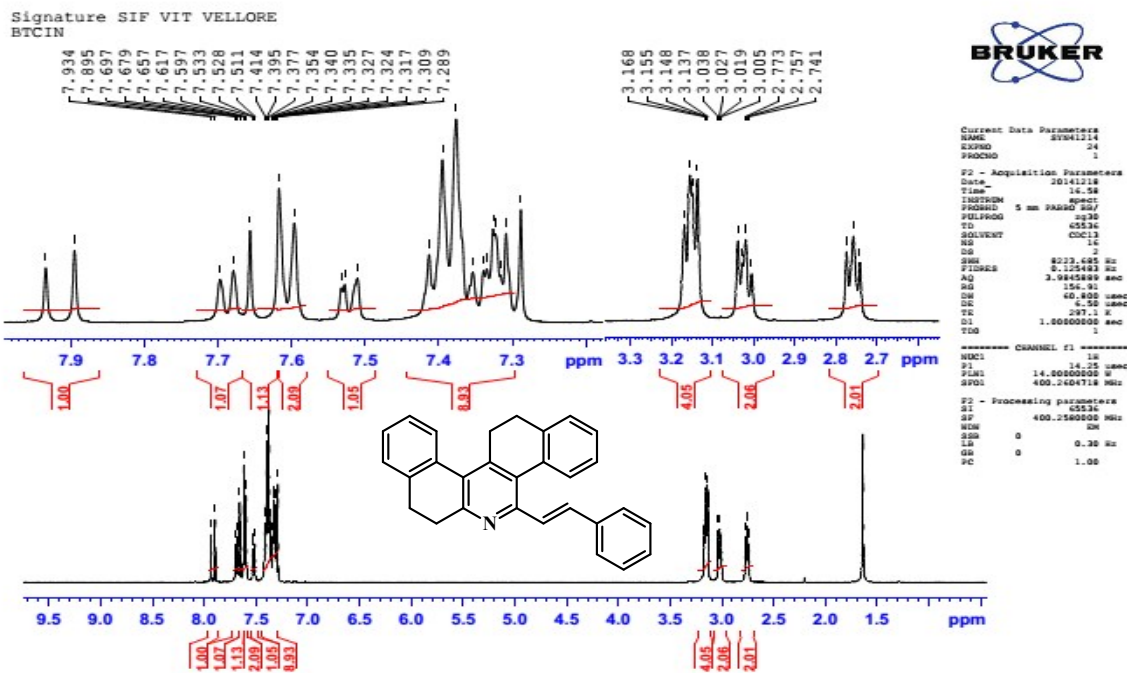

<sup>13</sup>C-NMR spectrum of 3a

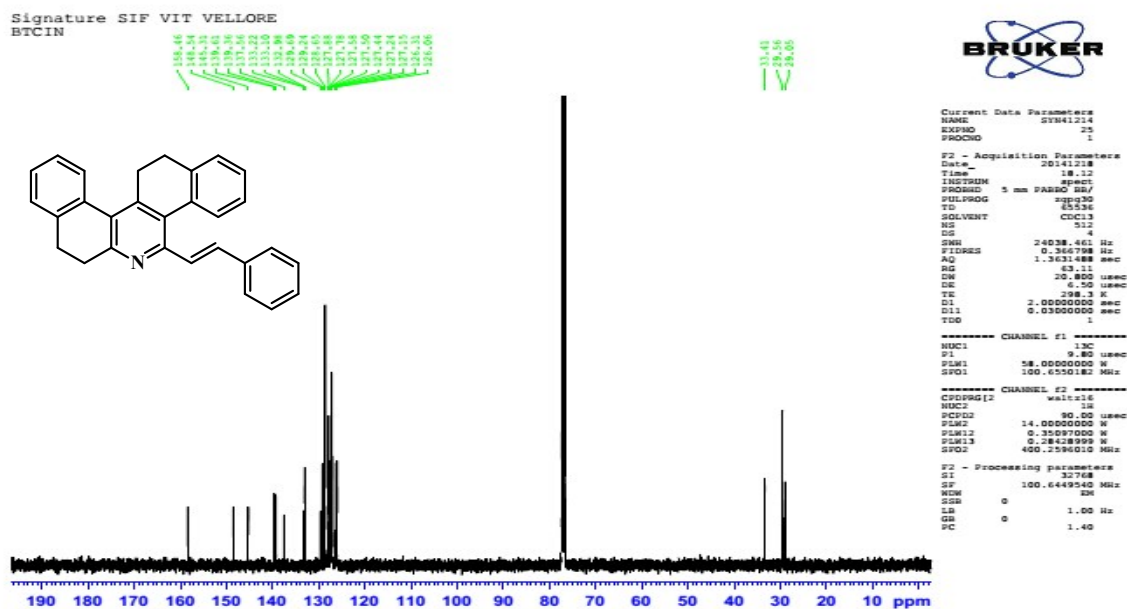

<sup>1</sup>H-NMR spectrum of 3b



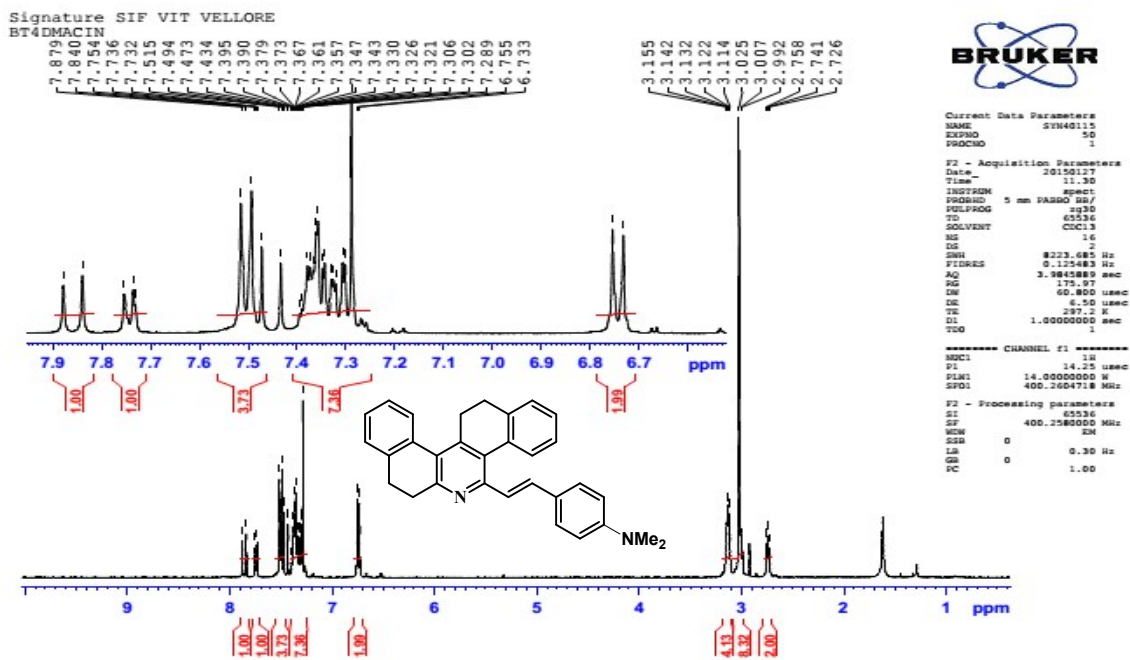

<sup>13</sup>C-NMR spectrum of 3c

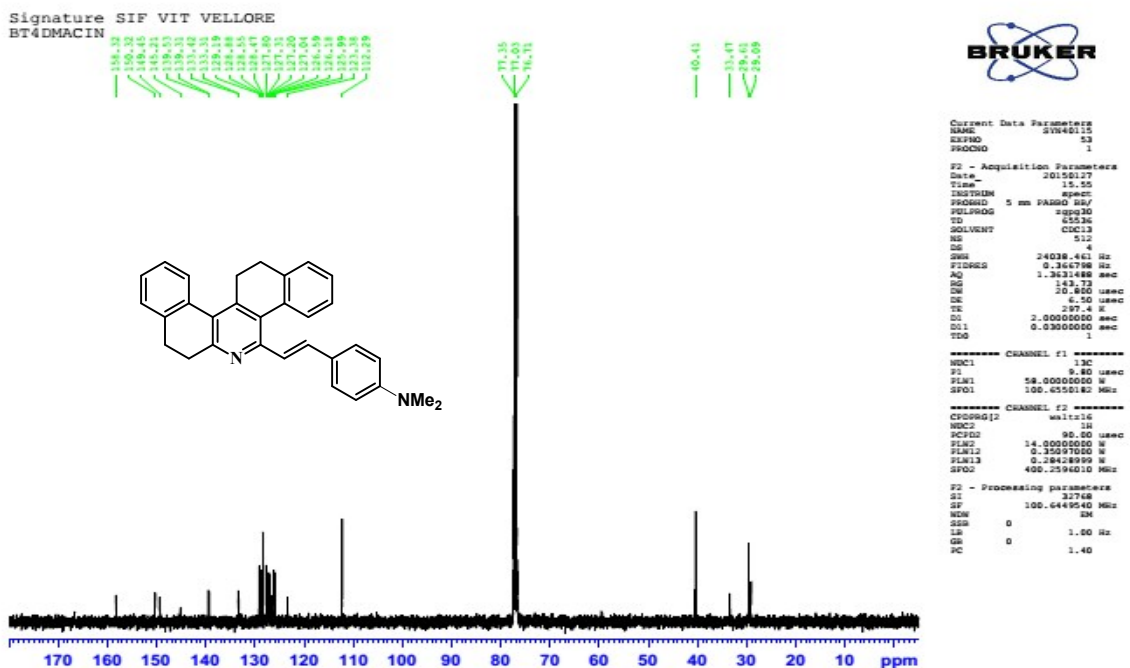

<sup>1</sup>H-NMR spectrum of 3d

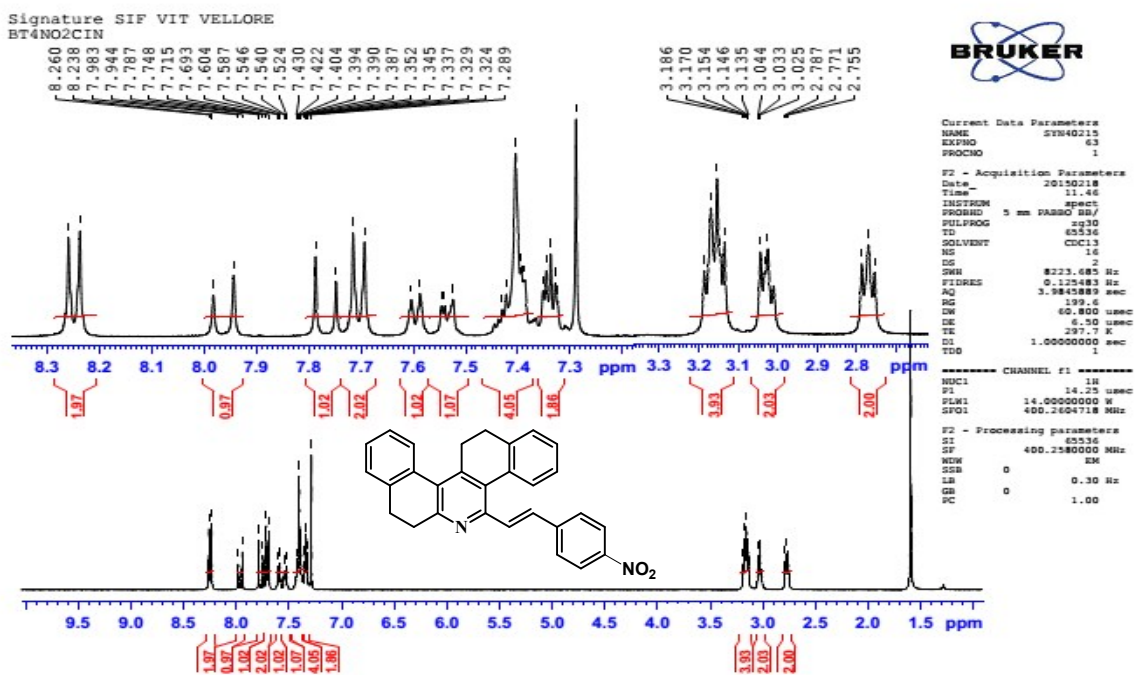

<sup>13</sup>C-NMR spectrum of 3d

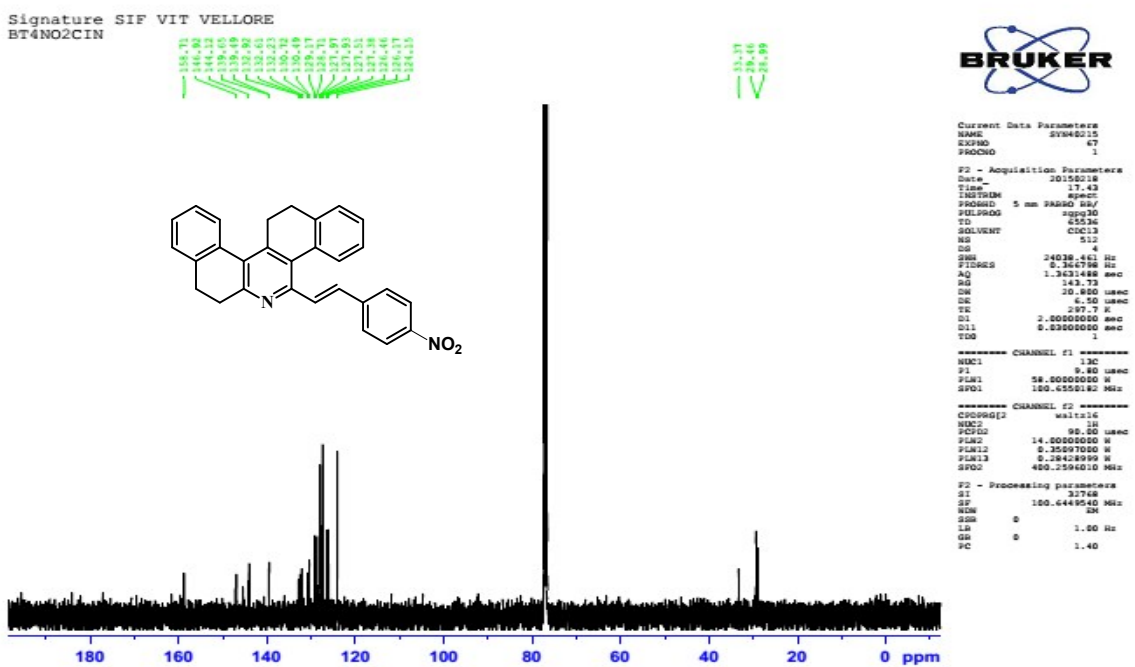

<sup>1</sup>H-NMR spectrum of 3e



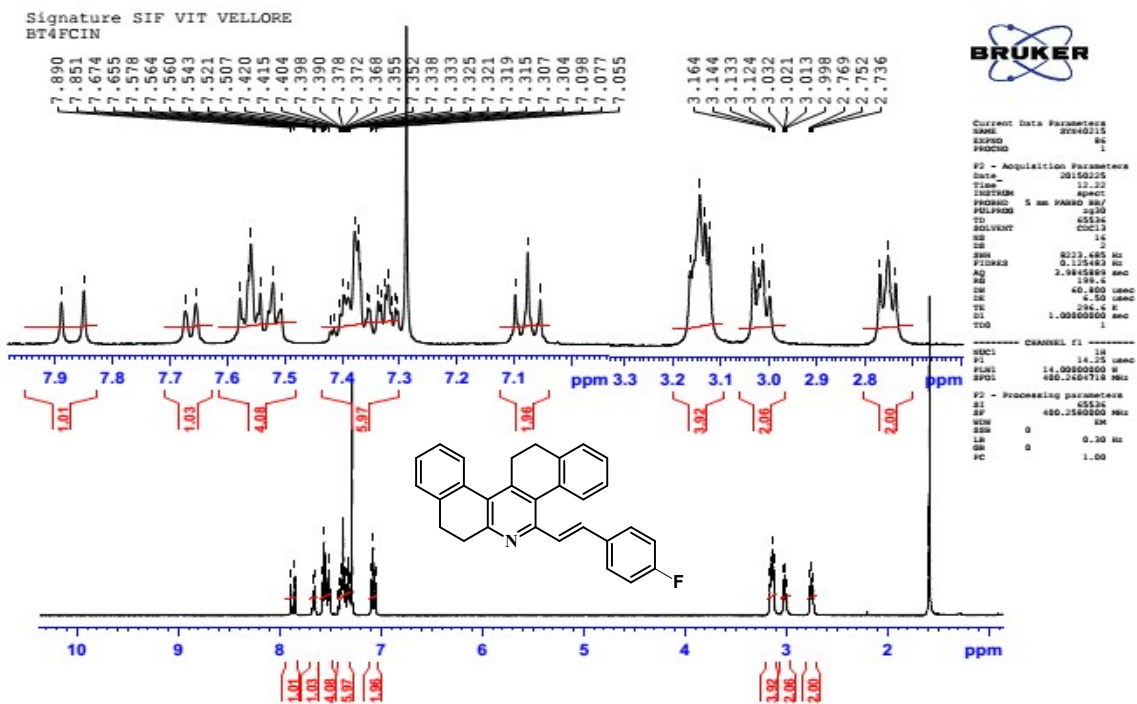

<sup>13</sup>C-NMR spectrum of 3e

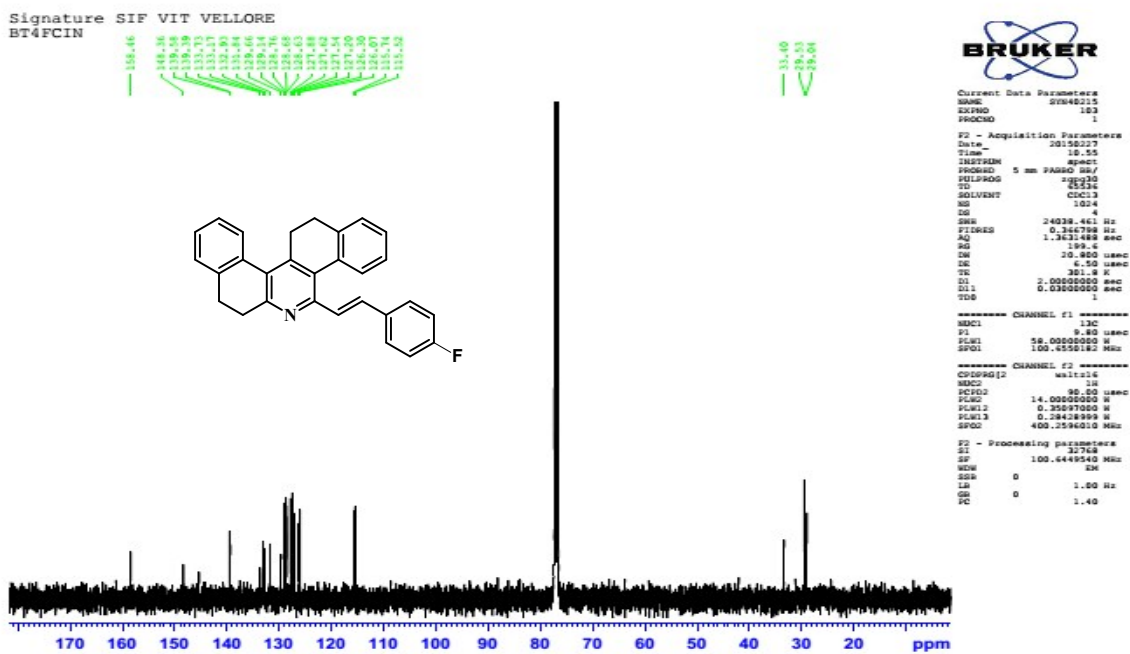

Crystal data:



Table 1. Crystal data and structure refinement for 3d\_cif.

|                                   |                                                               |                  |
|-----------------------------------|---------------------------------------------------------------|------------------|
| Identification code               | shelx                                                         |                  |
| Empirical formula                 | C <sub>29</sub> H <sub>22</sub> N <sub>2</sub> O <sub>2</sub> |                  |
| Formula weight                    | 430.48                                                        |                  |
| Temperature                       | 296(2) K                                                      |                  |
| Wavelength                        | 0.71073 Å                                                     |                  |
| Crystal system                    | Monoclinic                                                    |                  |
| Space group                       | P 2 <sub>1</sub> /c                                           |                  |
| Unit cell dimensions              | a = 7.6171(9) Å                                               | α = 90°.         |
|                                   | b = 21.660(3) Å                                               | β = 101.311(4)°. |
|                                   | c = 13.2670(17) Å                                             | γ = 90°.         |
| Volume                            | 2146.4(5) Å <sup>3</sup>                                      |                  |
| Z                                 | 4                                                             |                  |
| Density (calculated)              | 1.332 Mg/m <sup>3</sup>                                       |                  |
| Absorption coefficient            | 0.084 mm <sup>-1</sup>                                        |                  |
| F(000)                            | 904                                                           |                  |
| Crystal size                      | ? x ? x ? mm <sup>3</sup>                                     |                  |
| Theta range for data collection   | 1.826 to 24.009°.                                             |                  |
| Index ranges                      | -6 ≤ h ≤ 8, -24 ≤ k ≤ 24, -15 ≤ l ≤ 15                        |                  |
| Reflections collected             | 27079                                                         |                  |
| Independent reflections           | 3365 [R(int) = 0.0443]                                        |                  |
| Completeness to theta = 25.242°   | 86.8 %                                                        |                  |
| Refinement method                 | Full-matrix least-squares on F <sup>2</sup>                   |                  |
| Data / restraints / parameters    | 3365 / 0 / 298                                                |                  |
| Goodness-of-fit on F <sup>2</sup> | 1.241                                                         |                  |
| Final R indices [I > 2σ(I)]       | R1 = 0.0516, wR2 = 0.1313                                     |                  |
| R indices (all data)              | R1 = 0.0840, wR2 = 0.1688                                     |                  |
| Extinction coefficient            | n/a                                                           |                  |
| Largest diff. peak and hole       | 0.265 and -0.344 e.Å <sup>-3</sup>                            |                  |

Table 2. Atomic coordinates ( $\times 10^4$ ) and equivalent isotropic displacement parameters ( $\text{\AA}^2 \times 10^3$ ) for no2cin\_cif.  $U(\text{eq})$  is defined as one third of the trace of the orthogonalized  $U^{ij}$  tensor.

|       | x       | y       | z       | $U(\text{eq})$ |
|-------|---------|---------|---------|----------------|
| N(1)  | 2833(3) | 4720(1) | 5699(2) | 34(1)          |
| C(24) | 3513(3) | 3895(1) | 2871(2) | 32(1)          |
| C(1)  | 2566(3) | 5078(1) | 4852(2) | 30(1)          |
| C(21) | 2571(3) | 4959(1) | 6577(2) | 34(1)          |
| C(23) | 3398(3) | 4209(1) | 3826(2) | 35(1)          |
| C(22) | 2726(3) | 4769(1) | 3901(2) | 33(1)          |
| C(12) | 1920(3) | 5558(1) | 6679(2) | 32(1)          |
| C(2)  | 2023(3) | 5694(1) | 4886(2) | 31(1)          |
| C(25) | 3261(4) | 4197(1) | 1931(2) | 47(1)          |
| C(8)  | 583(4)  | 6572(1) | 3850(2) | 40(1)          |
| C(11) | 1569(3) | 5922(1) | 5792(2) | 33(1)          |
| C(13) | 1718(3) | 5758(1) | 7718(2) | 38(1)          |
| C(27) | 3835(4) | 3277(1) | 1097(2) | 47(1)          |
| C(29) | 3935(4) | 3272(1) | 2882(2) | 45(1)          |
| C(4)  | 3138(4) | 6105(1) | 3351(2) | 42(1)          |
| C(10) | 635(4)  | 6540(1) | 5712(2) | 41(1)          |
| C(28) | 4084(4) | 2959(1) | 1999(2) | 51(1)          |
| C(20) | 2921(4) | 4536(1) | 7489(2) | 45(1)          |
| C(3)  | 1910(3) | 6119(1) | 4004(2) | 35(1)          |
| C(26) | 3425(4) | 3894(2) | 1049(2) | 55(1)          |
| N(2)  | 4068(4) | 2960(2) | 165(2)  | 70(1)          |
| C(14) | 1801(4) | 6370(1) | 8040(2) | 49(1)          |
| C(5)  | 2949(4) | 6490(1) | 2509(2) | 50(1)          |
| C(18) | 1564(4) | 5301(1) | 8452(2) | 44(1)          |
| C(9)  | -531(4) | 6633(1) | 4655(2) | 45(1)          |
| C(17) | 1488(4) | 5477(2) | 9446(2) | 57(1)          |
| O(1)  | 4630(4) | 2432(1) | 244(2)  | 97(1)          |
| O(2)  | 3747(5) | 3236(2) | -650(2) | 117(1)         |
| C(7)  | 388(4)  | 6948(1) | 2990(2) | 53(1)          |
| C(19) | 1550(4) | 4633(1) | 8151(2) | 49(1)          |
| C(6)  | 1541(5) | 6897(1) | 2317(2) | 60(1)          |

|       |         |         |         |       |
|-------|---------|---------|---------|-------|
| C(15) | 1662(4) | 6534(2) | 9019(2) | 60(1) |
| C(16) | 1504(5) | 6089(2) | 9726(2) | 67(1) |

---

Table 3. Bond lengths [Å] and angles [°] for no2cin\_cif.

---

|             |          |
|-------------|----------|
| N(1)-C(21)  | 1.325(3) |
| N(1)-C(1)   | 1.348(3) |
| C(24)-C(29) | 1.387(4) |
| C(24)-C(25) | 1.387(4) |
| C(24)-C(23) | 1.455(3) |
| C(1)-C(2)   | 1.401(3) |
| C(1)-C(22)  | 1.455(3) |
| C(21)-C(12) | 1.407(3) |
| C(21)-C(20) | 1.499(4) |
| C(23)-C(22) | 1.329(3) |
| C(12)-C(11) | 1.398(3) |
| C(12)-C(13) | 1.481(3) |
| C(2)-C(11)  | 1.403(3) |
| C(2)-C(3)   | 1.479(3) |
| C(25)-C(26) | 1.369(4) |
| C(8)-C(7)   | 1.386(4) |
| C(8)-C(3)   | 1.395(4) |
| C(8)-C(9)   | 1.494(4) |
| C(11)-C(10) | 1.510(3) |
| C(13)-C(14) | 1.391(4) |
| C(13)-C(18) | 1.408(4) |
| C(27)-C(28) | 1.362(4) |
| C(27)-C(26) | 1.371(4) |
| C(27)-N(2)  | 1.455(4) |
| C(29)-C(28) | 1.377(4) |
| C(4)-C(5)   | 1.380(4) |
| C(4)-C(3)   | 1.394(4) |
| C(10)-C(9)  | 1.520(4) |
| C(20)-C(19) | 1.505(4) |
| N(2)-O(2)   | 1.218(4) |
| N(2)-O(1)   | 1.219(4) |
| C(14)-C(15) | 1.371(4) |
| C(5)-C(6)   | 1.373(4) |
| C(18)-C(17) | 1.384(4) |

|                   |          |
|-------------------|----------|
| C(18)-C(19)       | 1.500(4) |
| C(17)-C(16)       | 1.375(5) |
| C(7)-C(6)         | 1.374(4) |
| C(15)-C(16)       | 1.367(5) |
| <br>              |          |
| C(21)-N(1)-C(1)   | 118.9(2) |
| C(29)-C(24)-C(25) | 117.4(2) |
| C(29)-C(24)-C(23) | 119.9(2) |
| C(25)-C(24)-C(23) | 122.7(2) |
| N(1)-C(1)-C(2)    | 121.3(2) |
| N(1)-C(1)-C(22)   | 115.7(2) |
| C(2)-C(1)-C(22)   | 122.9(2) |
| N(1)-C(21)-C(12)  | 124.2(2) |
| N(1)-C(21)-C(20)  | 116.0(2) |
| C(12)-C(21)-C(20) | 119.8(2) |
| C(22)-C(23)-C(24) | 125.5(2) |
| C(23)-C(22)-C(1)  | 125.7(2) |
| C(11)-C(12)-C(21) | 116.8(2) |
| C(11)-C(12)-C(13) | 125.6(2) |
| C(21)-C(12)-C(13) | 117.5(2) |
| C(1)-C(2)-C(11)   | 119.1(2) |
| C(1)-C(2)-C(3)    | 122.6(2) |
| C(11)-C(2)-C(3)   | 118.3(2) |
| C(26)-C(25)-C(24) | 121.5(3) |
| C(7)-C(8)-C(3)    | 119.4(3) |
| C(7)-C(8)-C(9)    | 123.5(2) |
| C(3)-C(8)-C(9)    | 117.1(2) |
| C(12)-C(11)-C(2)  | 119.0(2) |
| C(12)-C(11)-C(10) | 124.6(2) |
| C(2)-C(11)-C(10)  | 116.4(2) |
| C(14)-C(13)-C(18) | 117.5(2) |
| C(14)-C(13)-C(12) | 123.8(2) |
| C(18)-C(13)-C(12) | 118.5(2) |
| C(28)-C(27)-C(26) | 121.7(3) |
| C(28)-C(27)-N(2)  | 119.2(3) |
| C(26)-C(27)-N(2)  | 119.0(3) |

|                   |          |
|-------------------|----------|
| C(28)-C(29)-C(24) | 121.8(3) |
| C(5)-C(4)-C(3)    | 120.9(3) |
| C(11)-C(10)-C(9)  | 111.3(2) |
| C(27)-C(28)-C(29) | 118.6(3) |
| C(21)-C(20)-C(19) | 110.6(2) |
| C(4)-C(3)-C(8)    | 118.7(2) |
| C(4)-C(3)-C(2)    | 122.4(2) |
| C(8)-C(3)-C(2)    | 118.8(2) |
| C(25)-C(26)-C(27) | 119.1(3) |
| O(2)-N(2)-O(1)    | 122.9(3) |
| O(2)-N(2)-C(27)   | 119.0(3) |
| O(1)-N(2)-C(27)   | 118.0(3) |
| C(15)-C(14)-C(13) | 122.0(3) |
| C(6)-C(5)-C(4)    | 119.4(3) |
| C(17)-C(18)-C(13) | 119.3(3) |
| C(17)-C(18)-C(19) | 121.3(3) |
| C(13)-C(18)-C(19) | 119.3(2) |
| C(8)-C(9)-C(10)   | 109.7(2) |
| C(16)-C(17)-C(18) | 121.5(3) |
| C(6)-C(7)-C(8)    | 120.6(3) |
| C(18)-C(19)-C(20) | 108.8(2) |
| C(7)-C(6)-C(5)    | 120.4(3) |
| C(16)-C(15)-C(14) | 120.0(3) |
| C(15)-C(16)-C(17) | 119.5(3) |

---

Symmetry transformations used to generate equivalent atoms:

Table 4. Anisotropic displacement parameters ( $\text{\AA}^2 \times 10^3$ ) for no2cin\_cif. The anisotropic displacement factor exponent takes the form:  $-2\pi^2 [ h^2 a^{*2} U^{11} + \dots + 2 h k a^* b^* U^{12} ]$

|       | U <sup>11</sup> | U <sup>22</sup> | U <sup>33</sup> | U <sup>23</sup> | U <sup>13</sup> | U <sup>12</sup> |
|-------|-----------------|-----------------|-----------------|-----------------|-----------------|-----------------|
| N(1)  | 36(1)           | 36(1)           | 31(1)           | 0(1)            | 5(1)            | 3(1)            |
| C(24) | 31(1)           | 33(1)           | 32(1)           | -2(1)           | 6(1)            | 0(1)            |
| C(1)  | 28(1)           | 32(1)           | 29(1)           | -1(1)           | 4(1)            | 1(1)            |
| C(21) | 32(1)           | 39(1)           | 31(1)           | 2(1)            | 4(1)            | -1(1)           |
| C(23) | 37(1)           | 36(2)           | 31(1)           | 2(1)            | 7(1)            | 2(1)            |
| C(22) | 36(1)           | 35(1)           | 29(1)           | 1(1)            | 5(1)            | 2(1)            |
| C(12) | 31(1)           | 37(1)           | 29(1)           | -4(1)           | 6(1)            | -2(1)           |
| C(2)  | 31(1)           | 31(1)           | 30(1)           | 0(1)            | 5(1)            | 0(1)            |
| C(25) | 60(2)           | 40(2)           | 39(2)           | 0(1)            | 7(1)            | 14(1)           |
| C(8)  | 47(2)           | 30(1)           | 40(2)           | -3(1)           | 5(1)            | 1(1)            |
| C(11) | 31(1)           | 31(1)           | 37(2)           | -5(1)           | 5(1)            | -2(1)           |
| C(13) | 32(1)           | 48(2)           | 34(2)           | -4(1)           | 6(1)            | -2(1)           |
| C(27) | 47(2)           | 54(2)           | 37(2)           | -16(1)          | 6(1)            | 1(1)            |
| C(29) | 58(2)           | 35(2)           | 43(2)           | 4(1)            | 14(1)           | 4(1)            |
| C(4)  | 49(2)           | 38(2)           | 39(2)           | -2(1)           | 9(1)            | 0(1)            |
| C(10) | 48(2)           | 34(1)           | 43(2)           | -2(1)           | 14(1)           | -1(1)           |
| C(28) | 63(2)           | 37(2)           | 54(2)           | -11(1)          | 16(2)           | 3(1)            |
| C(20) | 49(2)           | 48(2)           | 36(2)           | 4(1)            | 4(1)            | 4(1)            |
| C(3)  | 40(1)           | 31(1)           | 33(1)           | -5(1)           | 6(1)            | -2(1)           |
| C(26) | 67(2)           | 63(2)           | 33(2)           | 2(1)            | 4(1)            | 16(2)           |
| N(2)  | 77(2)           | 80(2)           | 51(2)           | -29(2)          | 10(2)           | 4(2)            |
| C(14) | 51(2)           | 54(2)           | 42(2)           | -12(1)          | 10(1)           | -5(1)           |
| C(5)  | 69(2)           | 44(2)           | 41(2)           | 2(1)            | 19(2)           | -4(2)           |
| C(18) | 39(2)           | 60(2)           | 34(2)           | 0(1)            | 7(1)            | 2(1)            |
| C(9)  | 47(2)           | 37(2)           | 50(2)           | 1(1)            | 9(1)            | 11(1)           |
| C(17) | 60(2)           | 76(2)           | 38(2)           | 6(2)            | 14(1)           | 3(2)            |
| O(1)  | 137(3)          | 76(2)           | 81(2)           | -37(2)          | 32(2)           | 13(2)           |
| O(2)  | 172(3)          | 136(3)          | 40(2)           | -19(2)          | 13(2)           | 41(2)           |
| C(7)  | 74(2)           | 36(2)           | 48(2)           | 6(1)            | 9(2)            | 11(1)           |
| C(19) | 54(2)           | 54(2)           | 38(2)           | 8(1)            | 8(1)            | -3(1)           |
| C(6)  | 95(3)           | 40(2)           | 47(2)           | 10(1)           | 16(2)           | 4(2)            |

|       |       |       |       |        |       |      |
|-------|-------|-------|-------|--------|-------|------|
| C(15) | 65(2) | 67(2) | 48(2) | -19(2) | 11(2) | 0(2) |
| C(16) | 77(2) | 87(3) | 39(2) | -15(2) | 17(2) | 5(2) |

---



SI Scheme 1 Mechanism for the formation of Phenanthridine.

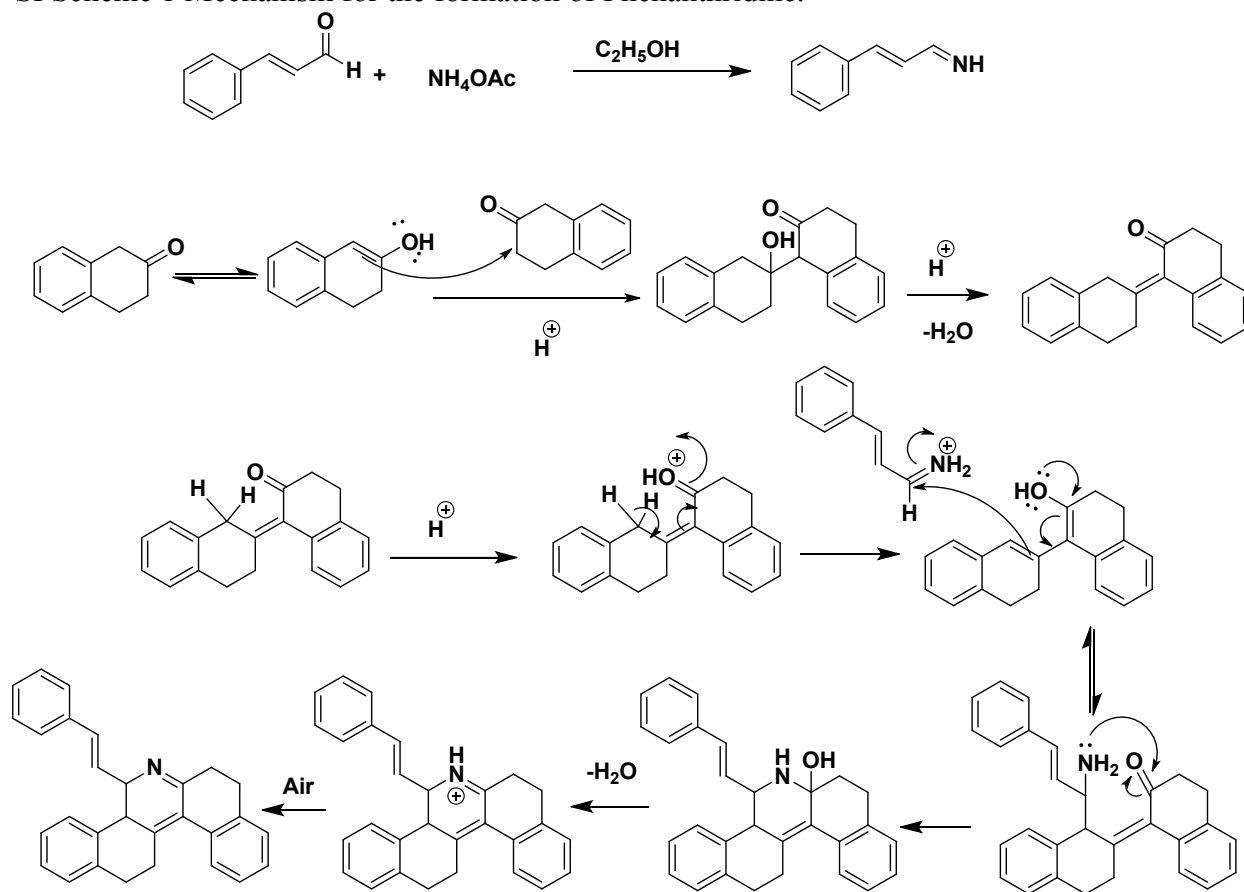

Supplement: c6ra09359k1.pdf [file c6ra09359k1.pdf]
